# Supplementary material
Source: publisher figshare collection journal article supplement (https://gsapubs.figshare.com/ndownloader/files/34171767)
Supplement: Supplementary file 1 [file 34171767]

## Sheet: Table S1
Supplementary Table S1. Major element compositions of minerals in the leucogranites and phengite gneisses.
Leucogranite YK173-10a: Plagioclase
Spot No.	SiO2	TiO2	Al2O3	FeOt	MnO	MgO	CaO	Na2O	K2O	Total	O	Si	Ti	Al	Fe3+	Fe2+	Mn	Mg	Ca	Na	K	Cation	An	Or	Ab
#1	70.61	0	20.639	0.029	0	0	0.126	10.094	0.107	101.605	8	3.00917	0	1.03663	0	0.00103358	0	0	0.00575336	0.834047	0.00581732	4.89245	0.680373	0.687938	98.6317
#2	70.637	0	20.4	0	0	0	0.134	10.951	0.103	102.225	8	3.00321	0	1.02221	0	0	0	0	0.00610421	0.902724	0.00558664	4.93984	0.667554	0.610952	98.7215
#3	69.85	0	19.905	0.016	0	0	0.095	12.088	0.107	102.061	8	2.99158	0	1.00474	0	0.000573088	0	0	0.00435941	1.00377	0.00584624	5.01086	0.429932	0.576565	98.9935
#4	70.511	0	19.339	0.032	0	0	0.084	10.271	0.092	100.329	8	3.04348	0	0.983793	0	0.00115513	0	0	0.00388476	0.859555	0.00506595	4.89693	0.447292	0.583295	98.9694
#5	70.822	0	19.491	0.051	0	0	0.091	9.039	0.111	99.605	8	3.06133	0	0.992961	0	0.00184366	0	0	0.00421458	0.757548	0.00612103	4.82402	0.548857	0.797131	98.654
#6	70.124	0	19.239	0.035	0	0	0.085	9.762	0.102	99.347	8	3.05038	0	0.986338	0	0.00127328	0	0	0.00396166	0.823329	0.0056604	4.87094	0.475617	0.679559	98.8448
#7	69.748	0	19.12	0.04	0	0.012	0.176	10.709	0.108	99.913	8	3.03272	0	0.979816	0	0.00145455	0	0.00077784	0.00819944	0.902811	0.00599079	4.93177	0.894158	0.653302	98.4525
#8	70.459	0.028	19.423	0.051	0	0	0.074	9.306	0.08	99.421	8	3.05527	0.000913421	0.992625	0	0.00184949	0	0	0.00343808	0.78239	0.0044255	4.84091	0.43506	0.56001	99.0049
#9	70.912	0	19.625	0.043	0	0	0.071	8.553	0.089	99.293	8	3.06682	0	1.00031	0	0.00155527	0	0	0.00329001	0.71719	0.00491041	4.79408	0.453551	0.676934	98.8695
#10	70.495	0.009	19.341	0	0	0	0.094	10.237	0.091	100.267	8	3.04385	0.000292353	0.984237	0	0	0	0	0.00434874	0.857008	0.00501263	4.89475	0.50195	0.578579	98.9195
#11	70.301	0.046	18.63	0.027	0	0	0.075	10.26	0.111	99.45	8	3.06112	0.00150687	0.956064	0	0.000983217	0	0	0.00349905	0.866189	0.00616596	4.89552	0.399502	0.703994	98.8965
#12	70.039	0	18.711	0.003	0	0	0.085	10.726	0.104	99.668	8	3.04991	0	0.960284	0	0.000109254	0	0	0.00396585	0.90559	0.00577749	4.92563	0.433268	0.63119	98.9355
#13	70.602	0.028	18.775	0.045	0	0	0.033	10.548	0.095	100.126	8	3.05642	0.000911913	0.957925	0	0.0016292	0	0	0.00153067	0.885346	0.00524661	4.90901	0.171576	0.588103	99.2403
#14	70.337	0.046	19.067	0.029	0	0	0.022	10.286	0.079	99.866	8	3.0495	0.00150038	0.974278	0	0.0010515	0	0	0.00102197	0.864646	0.00436949	4.89637	0.117463	0.502219	99.3803
#15	69.871	0.074	18.448	0.059	0	0	0.049	11.073	0.089	99.663	8	3.04847	0.00242894	0.948617	0	0.00215281	0	0	0.00229062	0.936695	0.00495376	4.94561	0.242666	0.524796	99.2325
#16	69.795	0	18.792	0	0	0.002	0.048	10.624	0.099	99.36	8	3.04734	0	0.966999	0	0	0	0.000130177	0.00224548	0.899358	0.00551432	4.92159	0.24754	0.607894	99.1446
#17	70.069	0	18.549	0.051	0	0.007	0.064	10.937	0.097	99.774	8	3.05118	0	0.951961	0	0.00185729	0	0.000454411	0.00298602	0.923396	0.00538857	4.93723	0.320468	0.578315	99.1012
#18	69.917	0	18.684	0.048	0	0.008	0.052	10.246	0.104	99.059	8	3.05696	0	0.962791	0	0.00175515	0	0.00052144	0.00243602	0.868576	0.00580095	4.89884	0.277826	0.661595	99.0606
#19	70.148	0.037	19.091	0.043	0	0	0.067	9.948	0.106	99.44	8	3.05122	0.00121077	0.978685	0	0.00156421	0	0	0.00312251	0.83896	0.00588198	4.88065	0.368236	0.693659	98.9381
#20	69.689	0	18.409	0.077	0	0.023	0.099	11.035	0.105	99.437	8	3.04831	0	0.949034	0	0.00281679	0	0.00149979	0.00463982	0.935869	0.00585928	4.94803	0.490277	0.619133	98.8906
#21	69.594	0	18.5	0.085	0	0.007	0.102	10.809	0.098	99.195	8	3.0486	0	0.955117	0	0.00311398	0	0.000457125	0.0047874	0.91804	0.00547664	4.9356	0.515715	0.589962	98.8943
#22	70.448	0	19.281	0.056	0	0.009	0.083	9.342	0.095	99.314	8	3.05883	0	0.98667	0	0.00203349	0	0.000582555	0.00386132	0.786455	0.00526223	4.84369	0.485347	0.661434	98.8532
#23	69.715	0	18.796	0.029	0	0	0.104	10.545	0.115	99.304	8	3.04615	0	0.967934	0	0.00105972	0	0	0.00486888	0.893343	0.00641035	4.91976	0.538222	0.708622	98.7532
#24	69.918	0	18.945	0.035	0	0	0.07	10.124	0.097	99.189	8	3.05138	0	0.974445	0	0.00127745	0	0	0.00327322	0.856655	0.00540055	4.89243	0.378263	0.624103	98.9976
Phengite gneiss YK173-10b: Plagioclase
Spot No.	SiO2	TiO2	Al2O3	FeOt	MnO	MgO	CaO	Na2O	K2O	Total	O	Si	Ti	Al	Fe3+	Fe2+	Mn	Mg	Ca	Na	K	Cation	An	Or	Ab
#1	70.136	0.019	20.548	0.035	0	0.006	0.129	10.364	0.084	101.321	8	3.00202	0.000611822	1.03657	0	0.00125287	0	0.000382852	0.00591606	0.860095	0.00458681	4.91143	0.67954	0.526857	98.7936
#2	70.484	0.019	20.456	0.045	0	0.004	0.089	10.676	0.115	101.888	8	3.00376	0.000609156	1.02743	0	0.00160382	0	0.000254123	0.00406383	0.882127	0.00625219	4.9261	0.455361	0.700571	98.8441
#3	70.35	0	20.065	0.029	0	0	0.123	11.147	0.088	101.802	8	3.00656	0	1.01065	0	0.00103651	0	0	0.00563225	0.923658	0.00479787	4.95234	0.602968	0.513642	98.8834
#4	70.805	0	20.862	0.016	0	0.013	0.103	8.745	0.211	100.755	8	3.0251	0	1.05048	0	0.000571695	0	0.000827996	0.00471503	0.724408	0.0115005	4.81761	0.636629	1.55282	97.8106
#5	70.11	0.037	19.884	0.043	0	0.002	0.115	11.696	0.096	101.983	8	2.99952	0.0011909	1.00261	0	0.00153854	0	0.000127559	0.00527158	0.970191	0.00523966	4.98569	0.537532	0.534276	98.9282
#6	70.19	0.009	20.439	0.011	0	0	0.072	11.655	0.105	102.481	8	2.98715	0.000288153	1.02517	0	0.000391509	0	0	0.0032831	0.961702	0.00570072	4.98368	0.338225	0.587288	99.0745
#7	68.381	0.019	19.093	0	0	0	0.128	12.115	0.09	99.826	8	2.99779	0.000626642	0.986499	0	0	0	0	0.00601239	1.02976	0.00503348	5.02573	0.577666	0.483612	98.9387
#8	68.325	0.037	20.599	0.027	0	0	0.135	11.942	0.087	101.152	8	2.95585	0.00120422	1.05028	0	0.000976864	0	0	0.00625759	1.00168	0.00480155	5.02104	0.617891	0.474117	98.908
#9	68.367	0	20.441	0.027	0	0	0.138	11.725	0.104	100.802	8	2.96484	0	1.04475	0	0.000979233	0	0	0.00641216	0.985858	0.0057537	5.00859	0.642485	0.576509	98.781
#10	67.992	0	20.528	0.005	0	0	0.106	11.989	0.145	100.765	8	2.95445	0	1.05129	0	0.000181701	0	0	0.0049351	1.01006	0.00803797	5.02896	0.482396	0.785696	98.7319
#11	68.185	0.046	20.357	0.013	0	0.009	0.101	12.055	0.116	100.882	8	2.95941	0.00150201	1.04132	0	0.000471875	0	0.000582327	0.00469687	1.01445	0.00642294	5.02886	0.457976	0.62628	98.9157
#12	68.308	0	20.905	0	0	0.012	0.092	11.246	0.113	100.676	8	2.95924	0	1.06737	0	0	0	0.000774993	0.00427038	0.944612	0.00624519	4.98251	0.447101	0.65386	98.899
#13	68.591	0	21.066	0	0	0.016	0.168	10.258	0.21	100.309	8	2.97082	0	1.07534	0	0	0	0.00103309	0.00779631	0.861428	0.0116035	4.92802	0.885112	1.31734	97.7976
#14	67.931	0.037	20.884	0.019	0	0	0.105	12.112	0.129	101.217	8	2.94089	0.00120507	1.06557	0	0.000687912	0	0	0.00487048	1.01666	0.0071246	5.03701	0.473481	0.692615	98.8339
#15	68.602	0.037	21.025	0.021	0	0.007	0.14	11.653	0.085	101.57	8	2.95129	0.0011975	1.06602	0	0.000755548	0	0.000448933	0.00645319	0.971987	0.00466502	5.00282	0.656409	0.474519	98.8691
#16	68.407	0.019	21.139	0	0	0.002	0.148	10.134	0.25	100.099	8	2.96843	0.000620269	1.0811	0	0	0	0.000129379	0.00688112	0.852618	0.0138397	4.92362	0.787909	1.58469	97.6274
#17	68.126	0.037	20.719	0.021	0	0.01	0.145	11.373	0.097	100.528	8	2.95861	0.00120886	1.06047	0	0.000762713	0	0.000647415	0.00674704	0.957628	0.0053741	4.99145	0.695751	0.554174	98.7501
#18	68.6	0	21.304	0.043	0	0.016	0.124	9.638	0.112	99.837	8	2.97501	0	1.08888	0	0.00155955	0	0.00103441	0.00576178	0.810398	0.00619643	4.88884	0.700643	0.753497	98.5459
#19	68.226	0.009	21.026	0.035	0	0.012	0.193	11.258	0.114	100.873	8	2.95228	0.000292988	1.07231	0	0.00126661	0	0.000774099	0.00894819	0.944529	0.00629319	4.98669	0.932326	0.655698	98.412
#20	68.533	0.028	21.059	0.024	0	0.001	0.129	10.809	0.106	100.689	8	2.96289	0.000910698	1.07303	0	0.000867751	0	6.44502e-05	0.00597554	0.906043	0.00584631	4.95563	0.651025	0.636946	98.712
#21	68.289	0	21.085	0.056	0	0	0.148	11.341	0.159	101.078	8	2.95057	0	1.07371	0	0.00202354	0	0	0.00685154	0.950067	0.0087642	4.99199	0.709502	0.907565	98.3829
#22	68.504	0	21.649	0.021	0	0	0.097	11.063	0.093	101.427	8	2.94347	0	1.09632	0	0.000754623	0	0	0.00446566	0.921644	0.00509783	4.97175	0.479556	0.547443	98.973
#23	68.17	0	21.01	0.04	0	0	0.11	11.201	0.087	100.618	8	2.95511	0	1.0734	0	0.00145013	0	0	0.00510909	0.941422	0.00481126	4.98131	0.53704	0.505734	98.9572
#24	68.373	0.028	20.885	0.048	0	0	0.136	10.468	0.099	100.037	8	2.97101	0.00091533	1.06957	0	0.00174433	0	0	0.00633184	0.881924	0.00548801	4.93699	0.708463	0.614047	98.6775
Phengite gneiss YK173-10b: Phengite
Comment	SiO2	TiO2	Al2O3	FeO	MnO	MgO	CaO	Na2O	K2O	Total	O	Si	Ti	Al	Fe3+	Fe2+	Mn	Mg	Ca	Na	K
#1	47.782	0.451	25.83	6.518	0.111	2.822	0.005	0.111	10.791	94.421	11	3.31262	0.0235225	2.11051	0.321344	0.056567	0.00651803	0.291657	0.000371406	0.0149203	0.954396
#2	47.759	0.358	25.99	5.988	0.091	2.811	0.029	0.164	10.727	93.917	11	3.31846	0.0187139	2.12835	0.283043	0.0649175	0.0053556	0.291172	0.00215899	0.0220939	0.950865
#3	48.077	0.398	26.354	6.119	0.113	2.899	0.018	0.149	10.376	94.503	11	3.31233	0.0206291	2.13993	0.219351	0.133218	0.00659418	0.297751	0.00132874	0.0199035	0.911981
#4	48.546	0.421	26.498	5.861	0.123	2.663	0	0.119	10.997	95.228	11	3.32345	0.0216829	2.13799	0.24721	0.0883539	0.00713225	0.271779	0	0.0157954	0.960438
#5	48.783	0.408	26.459	5.61	0.101	2.788	0	0.098	11.076	95.323	11	3.33196	0.0209648	2.12991	0.234843	0.0856076	0.00584303	0.283878	0	0.0129779	0.965102
#6	47.549	0.343	26.754	6.05	0.108	2.493	0.003	0.174	10.674	94.148	11	3.29454	0.0178792	2.18473	0.274331	0.0762403	0.00633815	0.257504	0.000222713	0.0233749	0.943495
#7	47.426	0.398	26.713	6.285	0.103	2.623	0.013	0.158	10.703	94.422	11	3.28262	0.0207247	2.17913	0.310688	0.0531248	0.00603848	0.270652	0.000964092	0.0212036	0.945082
#8	47.079	0.447	26.189	6.517	0.116	2.72	0	0.115	10.276	93.459	11	3.29013	0.0235013	2.15705	0.31236	0.0685311	0.0068664	0.283376	0	0.0155823	0.916155
#9	47.686	0.415	27.746	4.955	0.085	2.306	0.004	0.134	10.602	93.933	11	3.28587	0.0215133	2.25328	0.198137	0.0874057	0.00496094	0.236879	0.000295318	0.0179024	0.931979
#10	48.317	0.42	25.524	6.076	0.093	2.825	0	0.123	10.808	94.186	11	3.34745	0.0218909	2.0841	0.250424	0.101623	0.00545737	0.29177	0	0.0165222	0.955254
#11	47.76	0.407	25.871	5.996	0.11	2.799	0	0.171	10.784	93.898	11	3.3203	0.0212866	2.11974	0.308692	0.03992	0.00647726	0.290084	0	0.0230492	0.956428
#12	48.705	0.433	26.194	5.866	0.084	2.782	0.005	0.067	10.914	95.05	11	3.33752	0.0223222	2.11547	0.210629	0.125541	0.00487546	0.284194	0.000367105	0.00890168	0.954099
#13	48.706	0.451	26.306	5.835	0.085	2.826	0.003	0.144	10.718	95.074	11	3.3326	0.0232155	2.12135	0.213702	0.120193	0.00492613	0.288258	0.000219934	0.0191034	0.935566
#14	47.693	0.409	26.522	6.06	0.121	2.763	0	0.141	10.413	94.122	11	3.30034	0.0212925	2.16305	0.245372	0.105335	0.0070921	0.285032	0	0.0189178	0.919261
#15	47.286	0.35	27.259	5.914	0.088	2.609	0.026	0.165	10.852	94.549	11	3.26466	0.0181791	2.21805	0.334967	0.00650398	0.00514605	0.268527	0.00192331	0.022087	0.955816
#16	48.008	0.447	25.885	5.872	0.077	2.793	0.004	0.167	10.546	93.799	11	3.33206	0.0233403	2.1174	0.230288	0.110553	0.00452663	0.288987	0.000297461	0.0224731	0.933782
#17	47.825	0.427	26.1	6.093	0.102	2.858	0	0.141	10.715	94.261	11	3.31182	0.0222454	2.13014	0.290707	0.0621594	0.00598271	0.295041	0	0.0189312	0.946593
#18	49.095	0.396	25.373	5.94	0.091	3.148	0	0.116	11.126	95.285	11	3.36288	0.0204065	2.04834	0.278425	0.0618488	0.00527961	0.321453	0	0.0154056	0.972238
#19	48.067	0.276	26.849	6.134	0.111	2.735	0.016	0.23	10.678	95.096	11	3.297	0.0142423	2.17048	0.296986	0.0548849	0.00644882	0.279664	0.00117588	0.0305877	0.934374
#20	48.713	0.388	25.965	5.879	0.116	2.928	0	0.112	10.674	94.775	11	3.34417	0.020039	2.10082	0.193928	0.143604	0.00674509	0.299656	0	0.0149077	0.934825
#21	48.308	0.404	26.429	5.455	0.108	2.778	0	0.114	10.761	94.357	11	3.32686	0.0209313	2.14512	0.19722	0.116959	0.00629977	0.285204	0	0.0152218	0.945425
#22	49.277	0.418	26.24	5.243	0.118	2.804	0	0.082	10.995	95.177	11	3.35909	0.0214365	2.10813	0.152928	0.145972	0.00681311	0.284947	0	0.0108377	0.956164
#23	48.632	0.417	27.082	5.25	0.104	2.506	0	0.134	10.696	94.821	11	3.32401	0.0214425	2.18161	0.145106	0.154995	0.00602088	0.255346	0	0.0177579	0.932655
#24	47.978	0.463	26.411	5.776	0.095	2.567	0	0.144	10.653	94.087	11	3.3189	0.0240953	2.15324	0.216672	0.117481	0.00556623	0.264719	0	0.0193135	0.940119
#25	47.644	0.414	26.452	6.51	0.133	2.706	0	0.152	10.7	94.711	11	3.2912	0.0215153	2.15358	0.312236	0.0638569	0.00778187	0.278665	0	0.0203581	0.942952
#26	49.514	0.423	26.417	5.583	0.113	2.951	0	0.114	10.687	95.802	11	3.35233	0.0215456	2.10794	0.133735	0.182386	0.00648011	0.297849	0	0.0149648	0.923067
#27	47.584	0.411	26.832	5.817	0.1	2.613	0	0.129	10.737	94.223	11	3.29114	0.0213859	2.18723	0.314422	0.0220524	0.0058583	0.269422	0	0.0172991	0.947388
#28	48.494	0.415	28.304	4.452	0.114	2.19	0	0.119	10.745	94.833	11	3.29884	0.0212383	2.26922	0.109233	0.144043	0.00656846	0.222088	0	0.0156952	0.932478
#29	47.843	0.408	26.084	6.125	0.107	2.841	0	0.146	10.85	94.404	11	3.31119	0.0212435	2.12763	0.315611	0.0389078	0.00627243	0.29312	0	0.0195914	0.957977
#30	48.486	0.41	27.393	5.457	0.093	2.382	0.01	0.157	11.085	95.473	11	3.30321	0.0210137	2.19945	0.248682	0.0622319	0.00536646	0.241919	0.000729945	0.020738	0.963417
Phengite gneiss YK1711-1b: Phengite
Comment	SiO2	TiO2	Al2O3	FeO	MnO	MgO	CaO	Na2O	K2O	Total	O	Si	Ti	Al	Fe3+	Fe2+	Mn	Mg	Ca	Na	K
#1	49.137	0.365	26.32	4.942	0.101	2.958	0	0.092	10.79	94.705	11	3.35816	0.0187666	2.12	0.139262	0.143202	0.00584656	0.30137	0	0.0121907	0.940749
#2	48.93	0.388	27.399	4.928	0.097	2.813	0.036	0.195	10.664	95.45	11	3.31583	0.019781	2.18831	0.151403	0.127888	0.00556769	0.284181	0.00261391	0.0256212	0.921928
#3	48.587	0.366	26.267	5.703	0.123	2.894	0	0.105	10.943	94.988	11	3.33087	0.0188764	2.12229	0.249939	0.0770312	0.00714214	0.295763	0	0.0139564	0.957046
#4	50.476	0.405	26.979	4.59	0.099	2.626	0.004	0.116	10.807	96.102	11	3.38344	0.0204234	2.13136	0.0108505	0.246458	0.00562076	0.262408	0.00028728	0.0150758	0.924141
#5	49.807	0.369	26.872	4.492	0.108	2.538	0	0.066	11.274	95.526	11	3.37007	0.0187834	2.14291	0.107183	0.147005	0.00618953	0.256005	0	0.00865843	0.973163
#6	48.408	0.403	26.51	5.683	0.113	2.988	0.003	0.143	10.914	95.165	11	3.31366	0.0207537	2.13874	0.273892	0.0514476	0.00655172	0.304916	0.000220031	0.0189791	0.953091
#7	50.596	0.323	24.752	4.828	0.098	3.407	0.022	0.099	10.905	95.03	11	3.44124	0.0165273	1.98411	0.104164	0.170456	0.0056456	0.345445	0.00160322	0.0130551	0.946201
#8	49.758	0.383	24.947	4.999	0.104	3.305	0	0.074	10.917	94.487	11	3.41137	0.0197544	2.01577	0.151726	0.134901	0.00603928	0.337789	0	0.0098366	0.954836
#9	48.703	0.461	26.458	5.668	0.117	3.008	0	0.137	10.744	95.296	11	3.32375	0.0236687	2.12807	0.21612	0.107377	0.00676308	0.306027	0	0.0181276	0.935402
#10	49.447	0.383	25.288	5.275	0.098	3.283	0	0.088	10.938	94.8	11	3.38621	0.0197321	2.04101	0.19221	0.1099	0.00568442	0.335161	0	0.0116843	0.95559
#11	48.377	0.154	27.367	5.58	0.097	2.83	0	0.169	10.855	95.429	11	3.29662	0.00789496	2.19792	0.266154	0.0518492	0.0055987	0.287491	0	0.0223287	0.943667
#12	49.717	0.374	25.233	5.027	0.102	3.419	0	0.107	10.951	94.93	11	3.39509	0.019214	2.03082	0.180318	0.106776	0.00589974	0.34806	0	0.014167	0.954026
#13	48.678	0.383	26.018	5.674	0.097	3.071	0	0.148	10.973	95.042	11	3.33667	0.0197506	2.10189	0.272984	0.0522815	0.00563168	0.313811	0	0.0196693	0.959545
#14	49.848	0.387	25.573	4.898	0.111	3.216	0.004	0.093	10.454	94.584	11	3.4008	0.019863	2.05623	0.05658	0.22288	0.0064142	0.327083	0.000292391	0.0123017	0.909861
#15	49.898	0.409	24.834	5.043	0.122	3.403	0	0.126	11.081	94.916	11	3.41098	0.0210338	2.00077	0.184988	0.103317	0.00706385	0.346789	0	0.0166999	0.966349
#16	49.743	0.372	26.365	4.487	0.101	2.552	0	0.046	10.97	94.636	11	3.39126	0.0190797	2.11842	0.0426132	0.213218	0.00583225	0.259369	0	0.00608042	0.954102
#17	49.37	0.389	26.232	4.905	0.102	3.068	0	0.134	10.984	95.184	11	3.35959	0.0199146	2.10383	0.181292	0.0978527	0.00587907	0.311233	0	0.0176797	0.953548
#18	48.388	0.354	26.123	5.749	0.114	3.023	0	0.117	10.729	94.597	11	3.32962	0.0183257	2.11854	0.243798	0.0870407	0.00664427	0.310101	0	0.0156095	0.941836
#19	48.572	0.394	27.072	4.766	0.103	2.64	0	0.187	10.809	94.543	11	3.32517	0.020292	2.18426	0.166948	0.105918	0.00597243	0.269427	0	0.0248209	0.944002
#20	48.321	0.394	26.441	5.618	0.1	2.905	0	0.178	10.977	94.934	11	3.31654	0.0203444	2.13886	0.28109	0.0413864	0.00581346	0.297237	0	0.0236873	0.961151
#21	48.407	0.386	27.275	5.03	0.092	2.676	0	0.135	11.017	95.018	11	3.30638	0.019835	2.19566	0.218377	0.0689532	0.00532254	0.272483	0	0.0178783	0.959992
#22	50.282	0.4	25.398	4.791	0.103	2.973	0	0.05	11.104	95.101	11	3.42005	0.0204682	2.03599	0.0910329	0.181497	0.00593394	0.301456	0	0.00659382	0.963516
#23	49.123	0.346	26.259	5.019	0.112	2.995	0	0.096	11.006	94.956	11	3.35499	0.017778	2.11369	0.191228	0.0954487	0.00647904	0.304938	0	0.0127123	0.958949
#24	50.655	0.382	24.33	4.926	0.119	3.521	0.013	0.057	10.831	94.834	11	3.45309	0.0195906	1.95471	0.0874054	0.193427	0.00687097	0.357816	0.00094951	0.00753368	0.941918
#25	49.697	0.367	25.385	5.095	0.122	3.342	0.01	0.114	10.868	95	11	3.39074	0.0188378	2.04126	0.172011	0.11871	0.00705035	0.339922	0.000731031	0.0150805	0.945962
#26	49.965	0.378	25.255	5.225	0.084	3.374	0	0.103	10.846	95.23	11	3.40035	0.019353	2.02563	0.14978	0.1476	0.00484198	0.342303	0	0.0135907	0.941644
#27	49.039	0.389	25.571	5.478	0.103	3.166	0	0.127	10.933	94.806	11	3.36398	0.0200753	2.06736	0.228661	0.0856084	0.0059846	0.323766	0	0.0168913	0.956776
#28	48.294	0.363	26.896	5.014	0.088	2.687	0	0.118	10.6	94.06	11	3.32371	0.0187947	2.18159	0.141436	0.147154	0.00512977	0.27568	0	0.0157456	0.930668
#29	49.77	0.367	26.023	4.77	0.112	2.859	0	0.062	10.943	94.906	11	3.39023	0.0188073	2.08917	0.0918667	0.179869	0.00646197	0.290324	0	0.00818842	0.950948
#30	50.074	0.421	25.313	4.913	0.134	3.094	0.008	0.049	11.099	95.105	11	3.41058	0.0215724	2.03196	0.124297	0.155556	0.00773048	0.314155	0.000583817	0.00647081	0.964403
Phengite gneiss YK1711-1b: Phengite
Comment	SiO2	TiO2	Al2O3	FeO	MnO	MgO	CaO	Na2O	K2O	Total	O	Si	Ti	Al	Fe3+	Fe2+	Mn	Mg	Ca	Na	K
#1	47.749	0.412	25.799	7.358	0.124	2.617	0	0.134	10.734	94.927	11	3.30623	0.0214618	2.10536	0.345507	0.080578	0.00727237	0.270135	0	0.0179896	0.948177
#2	47.755	0.374	25.649	7.549	0.15	2.638	0.006	0.108	10.561	94.79	11	3.31136	0.0195101	2.09611	0.316246	0.121523	0.00880978	0.272691	0.000445769	0.0145197	0.934226
#3	48.165	0.475	25.793	7.135	0.12	2.675	0.002	0.119	10.743	95.227	11	3.31765	0.0246146	2.09391	0.299155	0.111863	0.0070011	0.274683	0.000147605	0.0158925	0.944027
#4	48.309	0.421	25.853	7.285	0.134	2.595	0.016	0.147	10.867	95.627	11	3.31872	0.0217583	2.09319	0.313222	0.10532	0.0077971	0.265759	0.0011777	0.0195797	0.952382
#5	47.576	0.444	25.763	7.867	0.151	2.717	0	0.104	10.883	95.505	11	3.28795	0.0230845	2.0984	0.404412	0.0502766	0.00883893	0.279921	0	0.0139353	0.9595
#6	48.212	0.417	26.023	6.937	0.11	2.738	0	0.107	10.844	95.388	11	3.31347	0.0215607	2.10786	0.310633	0.0880857	0.00640333	0.280523	0	0.014258	0.950772
#7	46.914	0.371	26.606	7.435	0.137	2.346	0.003	0.176	10.627	94.615	11	3.26053	0.0193981	2.17932	0.368142	0.0640077	0.00806477	0.243064	0.000223397	0.0237162	0.942226
#8	47.824	0.334	26.222	6.687	0.105	2.478	0.018	0.192	10.391	94.251	11	3.31435	0.017414	2.14177	0.243036	0.144534	0.00616349	0.256013	0.00133658	0.0257988	0.918689
#9	47.839	0.411	25.787	7.454	0.139	2.632	0	0.09	10.978	95.33	11	3.3038	0.0213537	2.09888	0.369207	0.0613082	0.00813078	0.270973	0	0.0120509	0.967195
#10	47.305	0.477	25.708	7.506	0.144	2.58	0.019	0.134	10.623	94.496	11	3.29438	0.0249911	2.11004	0.356989	0.0801737	0.00849405	0.267852	0.00141772	0.0180933	0.943785
#11	48.342	0.342	25.61	6.784	0.116	2.755	0	0.108	10.914	94.971	11	3.33563	0.0177533	2.08266	0.305778	0.0857001	0.0067795	0.283389	0	0.0144486	0.96072
#12	47.19	0.433	27.076	7.507	0.142	2.278	0.022	0.179	10.708	95.535	11	3.24897	0.0224276	2.19703	0.362809	0.0694357	0.00828075	0.233807	0.00162289	0.0238944	0.940509
#13	47.801	0.433	26.341	7.591	0.146	2.477	0.013	0.144	10.9	95.846	11	3.28417	0.0223808	2.13293	0.380002	0.0561679	0.00849625	0.253701	0.00095698	0.0191822	0.955376
#14	46.548	0.486	26.463	7.746	0.144	2.414	0.005	0.154	10.873	94.833	11	3.2422	0.0254668	2.17237	0	0.451215	0.00849546	0.250659	0.000373146	0.0207973	0.966156
#15	48.181	0.416	25.49	7.377	0.138	2.796	0	0.104	10.724	95.226	11	3.32394	0.0215909	2.07254	0.324679	0.100945	0.00806386	0.287557	0	0.013911	0.94383
#16	48.26	0.348	25.878	7.111	0.134	2.727	0.015	0.141	10.757	95.371	11	3.31893	0.0180049	2.09748	0.306463	0.102524	0.00780552	0.279579	0.00110528	0.0188009	0.943761
#17	47.12	0.369	26.952	7.119	0.102	2.399	0	0.174	10.708	94.943	11	3.25869	0.0191983	2.19677	0.363283	0.0484581	0.0059748	0.24733	0	0.023331	0.944724
#18	47.975	0.535	25.818	7.355	0.136	2.751	0	0.1	11.027	95.697	11	3.30007	0.0276861	2.09308	0.377316	0.0457987	0.00792379	0.282102	0	0.0133369	0.967664
#19	49.062	0.362	25.79	5.986	0.109	2.658	0	0.109	10.946	95.022	11	3.36374	0.0186718	2.08393	0.194501	0.148726	0.00632979	0.271669	0	0.0144894	0.957396
#20	48.007	0.477	26.345	6.549	0.098	2.485	0	0.151	10.8	94.912	11	3.30863	0.0247322	2.13992	0.267665	0.109809	0.00572079	0.255316	0	0.0201775	0.94957
#21	49.858	0.311	24.378	6.241	0.124	3.202	0.002	0.109	10.939	95.164	11	3.4175	0.0160374	1.96937	0.21455	0.143212	0.00719914	0.327192	0.000146884	0.0144859	0.956555
#22	47.789	0.352	26.505	6.916	0.125	2.664	0.014	0.159	10.863	95.387	11	3.28654	0.0182118	2.1483	0.367297	0.0304744	0.00728127	0.27312	0.0010316	0.0212009	0.95306
#23	49.559	0.337	25.935	6.369	0.125	2.879	0	0.149	11.069	96.422	11	3.35634	0.0171701	2.07007	0.254062	0.106668	0.00717032	0.290665	0	0.0195648	0.956336
#24	47.798	0.385	26.034	6.949	0.124	2.664	0	0.105	10.684	94.743	11	3.30669	0.0200375	2.12266	0.289716	0.112328	0.00726593	0.274743	0	0.0140838	0.942924
#25	48.232	0.445	26.25	6.764	0.134	2.675	0.015	0.141	10.917	95.573	11	3.30739	0.0229567	2.12146	0.315217	0.0726836	0.00778288	0.273452	0.00110208	0.0187463	0.95502
#26	48.396	0.515	25.795	7.031	0.137	2.718	0.013	0.117	10.567	95.289	11	3.32522	0.0266206	2.08883	0.244012	0.160001	0.00797293	0.2784	0.00095703	0.0155863	0.926237
#27	47.645	0.323	27.16	6.167	0.117	2.37	0.007	0.139	10.775	94.703	11	3.28303	0.016744	2.20568	0.261788	0.0935971	0.00682857	0.243453	0.000516805	0.0185703	0.947184
#28	48.87	0.375	26.515	5.922	0.107	2.54	0.002	0.074	10.861	95.266	11	3.33873	0.0192739	2.13494	0.179923	0.158433	0.00619167	0.25869	0.000146399	0.00980206	0.946602
#29	49.156	0.325	25.857	6.557	0.116	2.794	0.024	0.118	10.681	95.628	11	3.35405	0.0166831	2.07935	0.207048	0.16712	0.00670405	0.284202	0.00175459	0.0156107	0.929746
#30	47.663	0.401	26.018	6.969	0.124	2.635	0	0.128	10.5	94.438	11	3.30523	0.0209201	2.12643	0.273093	0.131072	0.0072833	0.272401	0	0.0172099	0.9289
